# Supplementary material for: Ultrasound-mediated piezoelectric nanoparticle modulation of intrinsic cardiac autonomic nervous system for rate control in atrial fibrillation
Source: Royal Society of Chemistry journal article supplement (doi:10.1039/d2bm01733d), 2022-12-08
Supplement: d2bm01733d1.pdf [file d2bm01733d1.pdf]

## **Supplemental Material**

### **Title: Ultrasound-Mediated Piezoelectric Nanoparticle Modulation of Intrinsic Cardiac Autonomic Nervous System for Rate Control in Atrial Fibrillation**

**Authors:** Jiapeng Han<sup>†</sup>, Yuanzheng Zhang<sup>†</sup>, Xiaofei Wang<sup>†</sup>, Guocheng Zhang, Zhiyao Yu, Changyi Wang, Tianyou Xu, Zhen Zhou, Xiaomeng Yang, Xiaoxing Jin, Chenzhe Liu, Liping Zhou, Yueyi Wang, Baopeng Tang\*, Shishang Guo\*, Hong Jiang\*, Lilei Yu\*

#### **Supplemental Material List:**

**Figure S1.** The H&E staining of IRGP tissue and atria myocardium tissues. **(Page 2)**

**Figure S2.** ECGs of ventricular rate changes in atrial fibrillation. **(Page 3)**

**Figure S1**

**A**

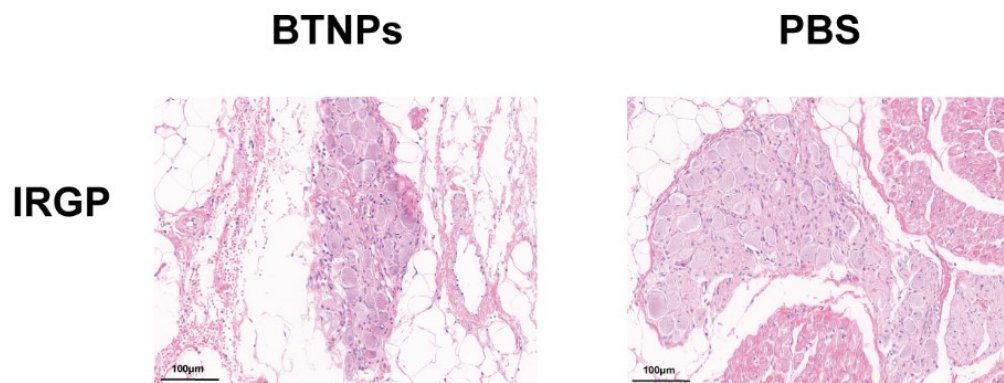

**B**

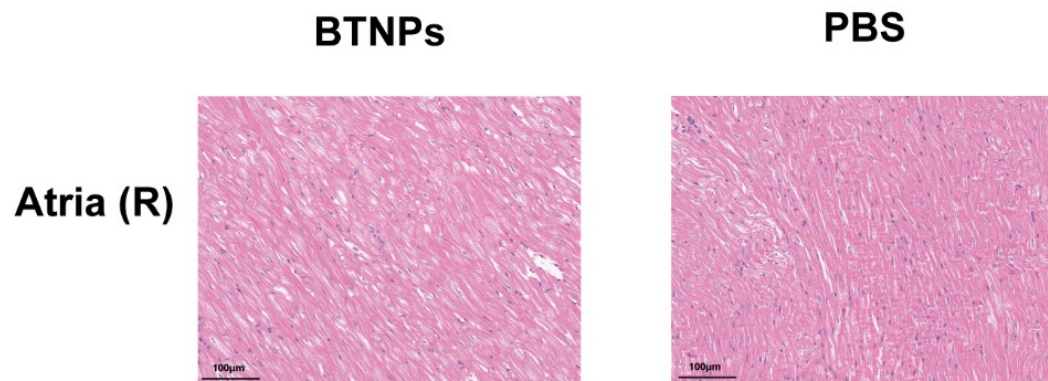

**Figure S1: The H&E staining of IRGP tissue and atria myocardium tissues. (A)** Histopathological measurement of IRGP treated with BTNPs and PBS. **(B)** Histopathological measurement of atria in both groups. Magnification: X400.

**Figure S2**

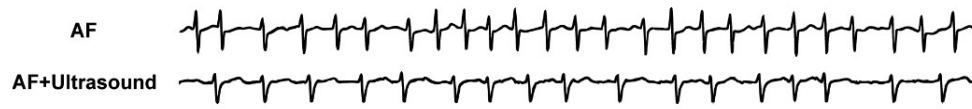

**Figure S2: ECGs of ventricular rate changes in atrial fibrillation.**
